# Supplementary material
Source: Royal Society of Chemistry journal article supplement (doi:10.1039/d5lc00827a)
Supplement: d5lc00827a1.pdf [file d5lc00827a1.pdf]

Supplementary Information

## **Mechanoadaptive root growth in *Medicago sativa* under controlled microhydrodynamic environments**

**Doh-Won Yi<sup>1</sup>, Joengmok Kim<sup>1</sup>, and Joong Yull Park<sup>1,2\*</sup>**

<sup>1</sup>Department of Mechanical Engineering, Graduate School, Chung-Ang University, 84 Heukseok-ro, Dongjak-gu, Seoul 06974, Republic of Korea

<sup>2</sup>Department of Mechanical Intelligent Energy and Industry, Graduate School, Chung-Ang University, 84 Heukseok-ro, Dongjak-gu, Seoul 06974, Republic of Korea

\*E-mail: jrpark@cau.ac.kr

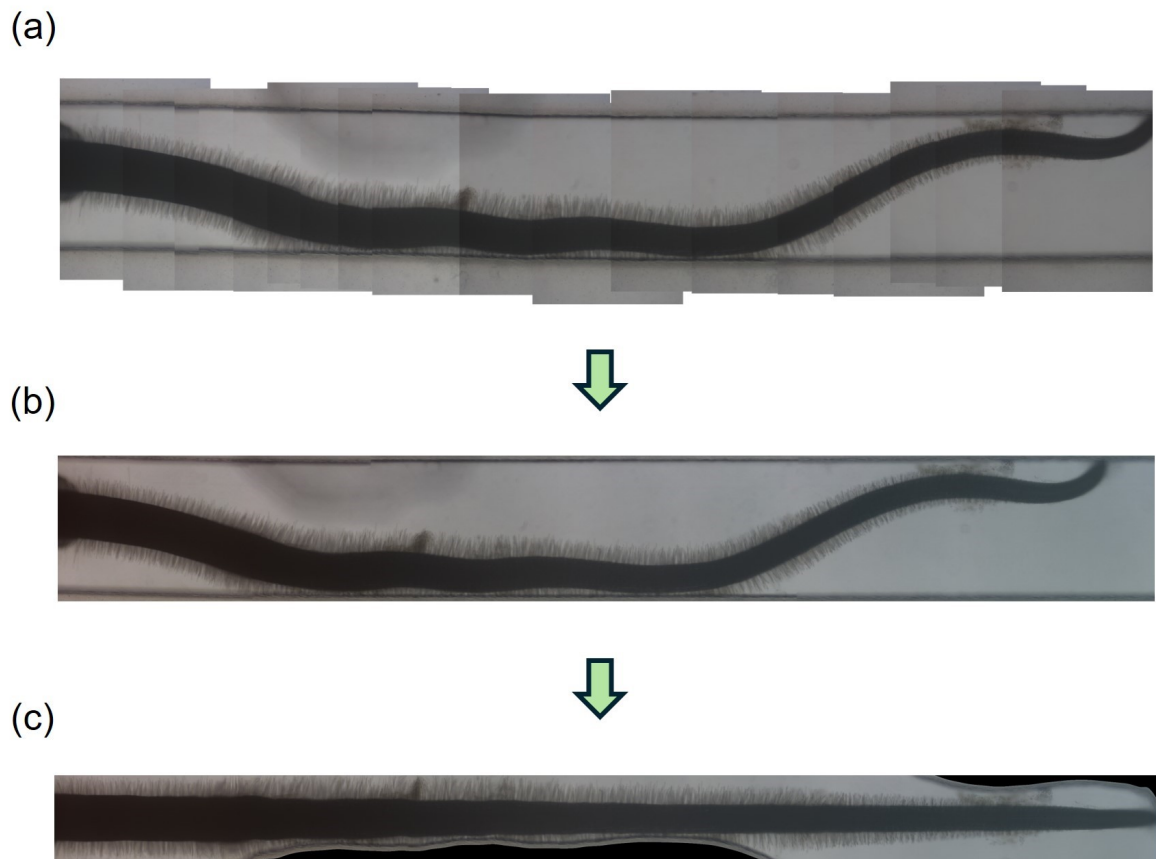

**Fig. S1** Process of image merging and root straightening. (a) Sequential images of *Medicago sativa* roots. (b) Sequential images merged into a single image using Image Composite Editor and MosaicJ software. (c) The root straightened using an ImageJ macro

(a)

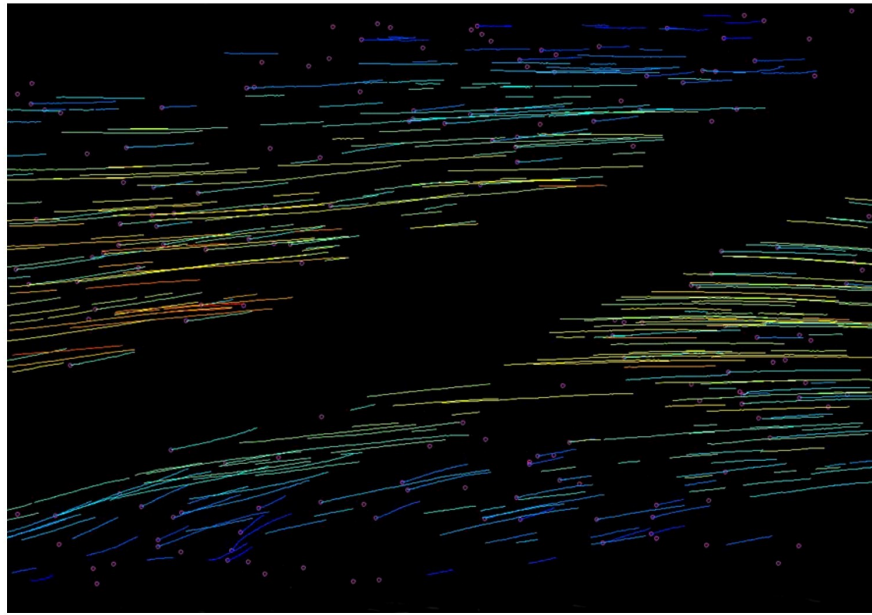

(b)

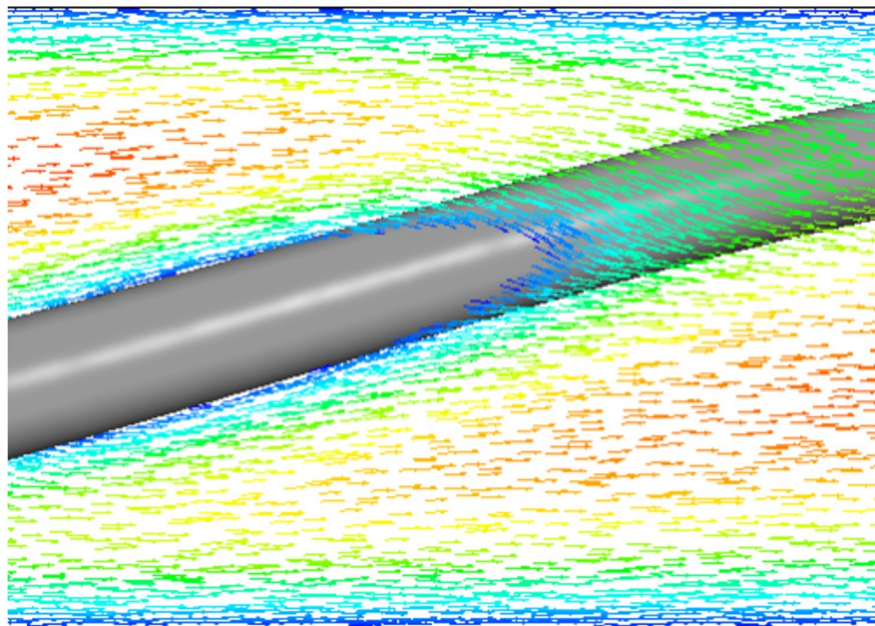

**Fig. S2** Validation of the computational fluid dynamics (CFD) results. (a) Visualization of particle tracking within the channel. *Medicago sativa* root located in the middle of the channel. Pathlines are presented by ImgaeJ software. (b) Vector field obtained from CFD results. The results exhibit a high degree of similarity to the visualization of particle tracking, supporting the validity of the CFD results

(a)

Inlet flow rate: 100  $\mu\text{L}/\text{min}$

Flow direction  $\rightarrow$

Channel: A

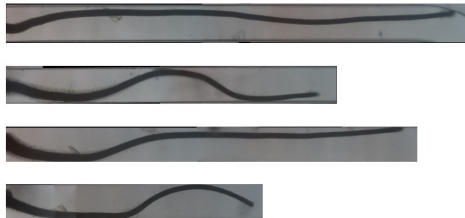

D

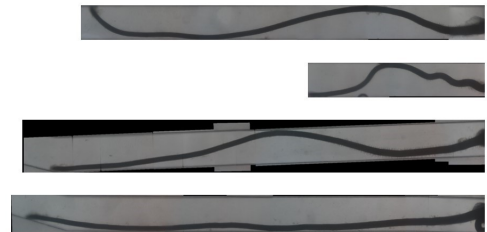

B

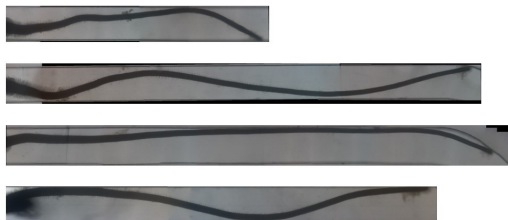

E

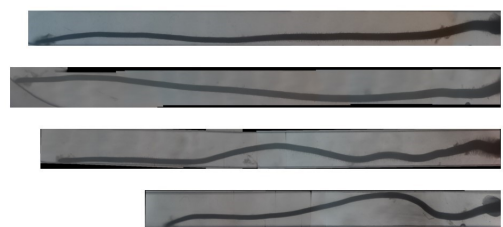

C

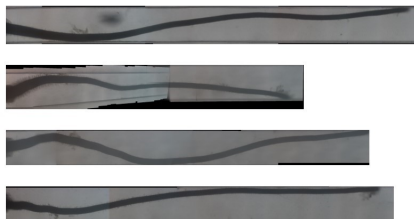

F

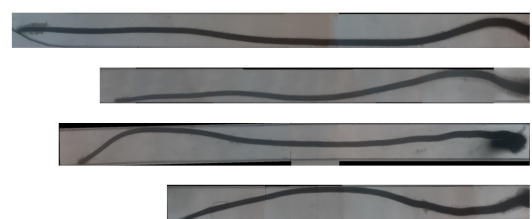

2 mm

**Fig. S3** Merged *Medicago sativa* roots images of inlet flow rate of (a) 100, (b) 50, (c) 10, (d) 5, (e) 1, and (f) 0.1  $\mu\text{L}/\text{min}$ , and (g) control group. Scale bar represents 2 mm. Channels A, B, and C are the forward group, in which the roots grow along the direction of fluid flow, and Channels D, E, and F are the reverse group, in which the roots grow opposite to the direction of fluid flow

(b)

Inlet flow rate: 50  $\mu\text{L}/\text{min}$

Flow direction  $\rightarrow$

Channel: A

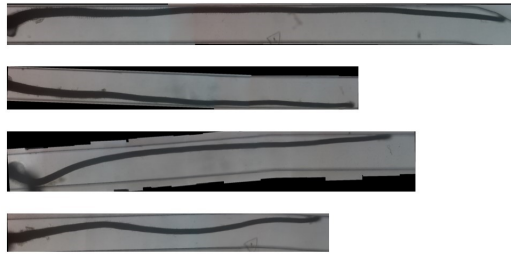

B

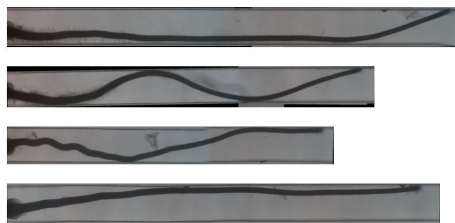

C

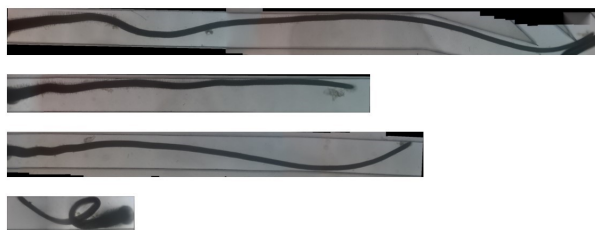

D

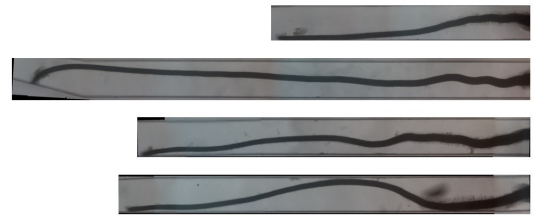

E

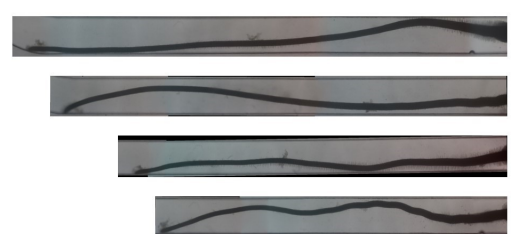

F

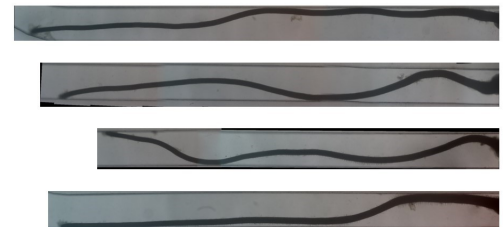

2 mm

Fig.S3 (Continued)

(c)

Inlet flow rate: 10  $\mu\text{L}/\text{min}$

Flow direction  $\rightarrow$

Channel: A

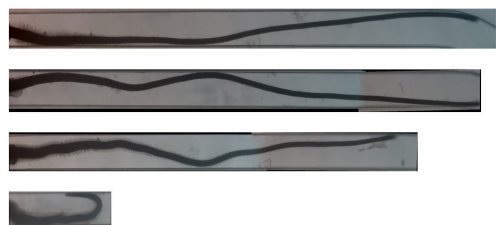

B

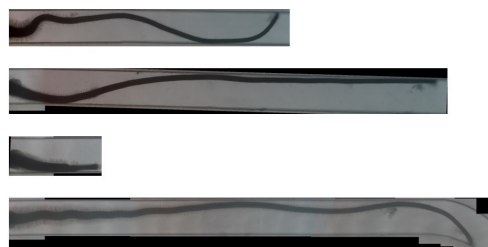

C

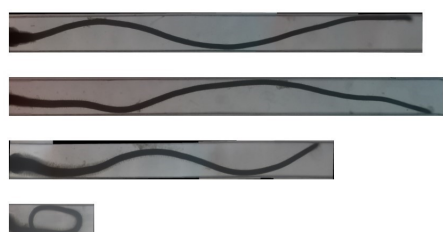

D

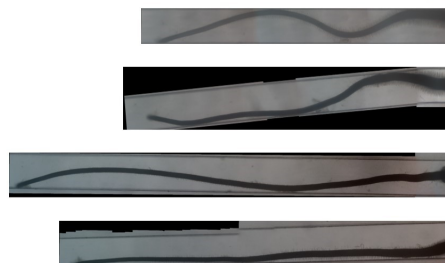

E

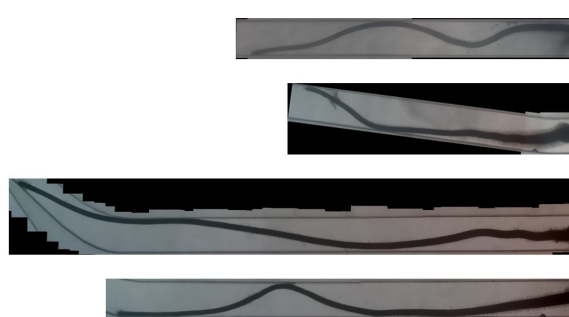

F

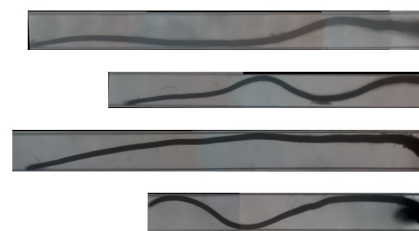

2 mm

**Fig.S3** (Continued)

(d)

Inlet flow rate: 5  $\mu\text{L}/\text{min}$

Flow direction  $\rightarrow$

Channel: A

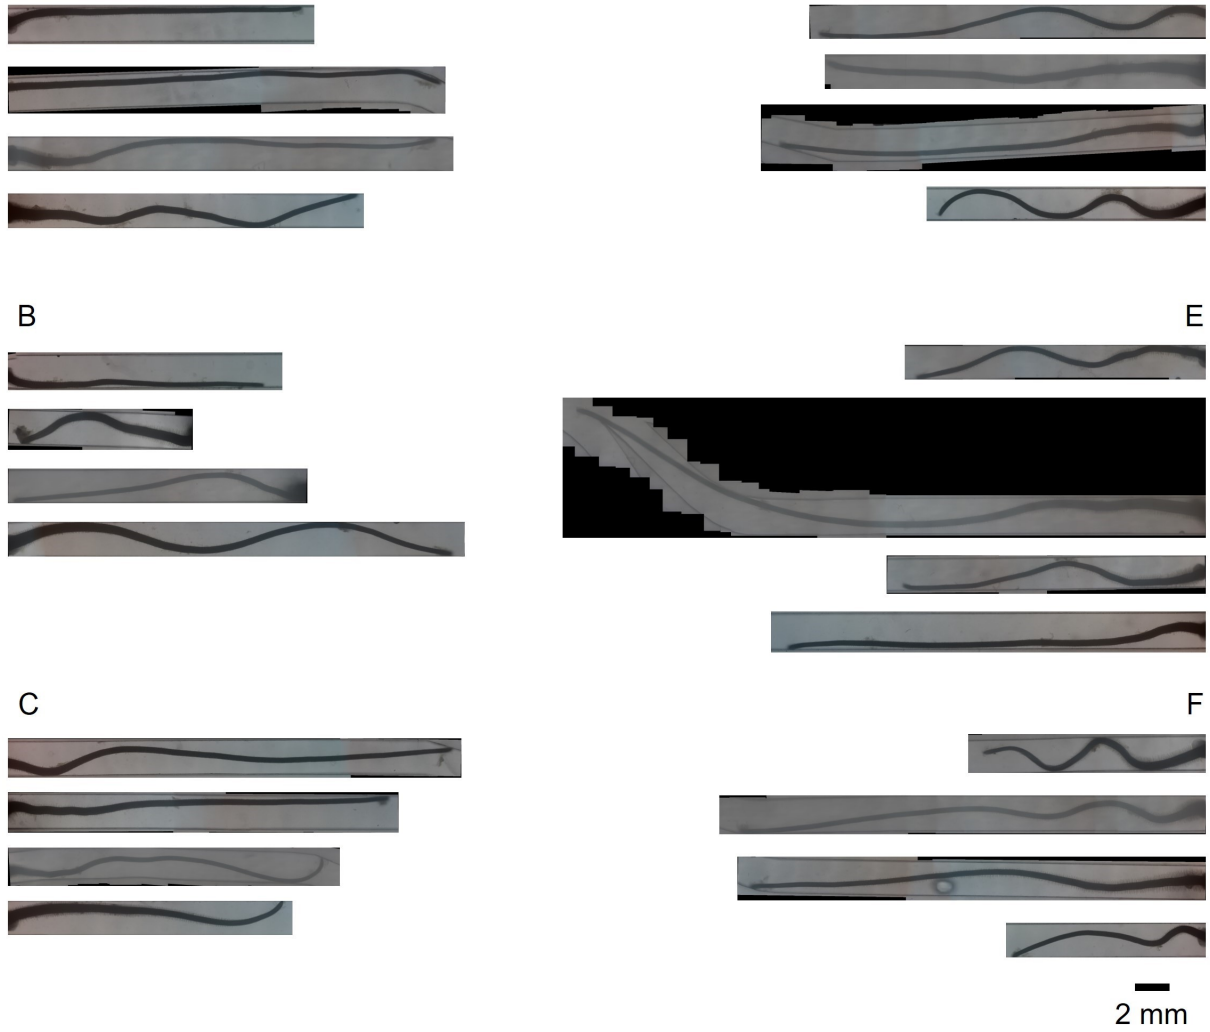

**Fig.S3** (Continued)

(e)

Inlet flow rate: 1  $\mu\text{L}/\text{min}$

Flow direction  $\rightarrow$

Channel: A

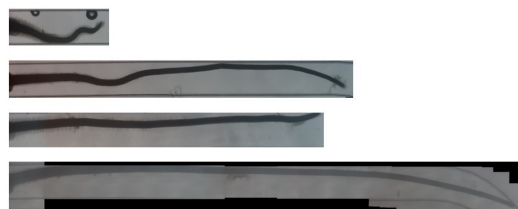

B

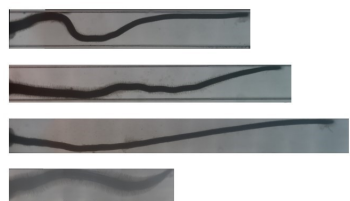

C

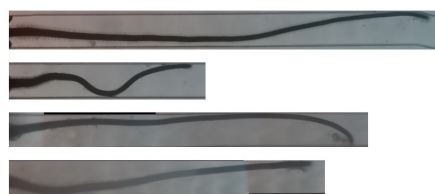

D

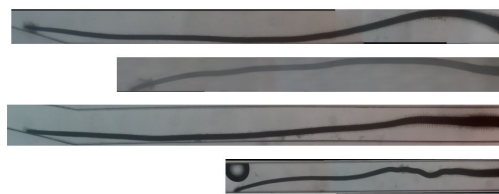

E

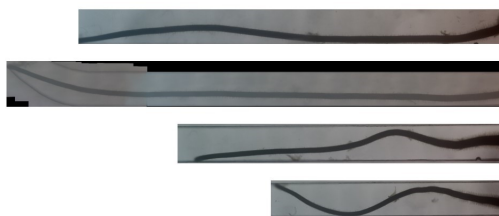

F

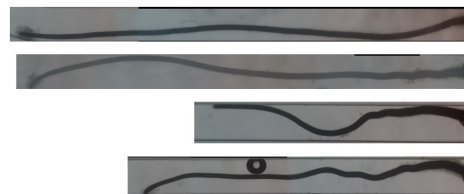

2 mm

Fig.S3 (Continued)

(f)

Inlet flow rate: 0.1  $\mu\text{L}/\text{min}$

Flow direction  $\rightarrow$

Channel: A

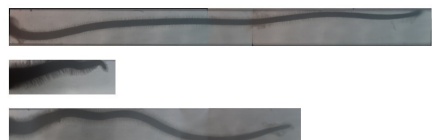

B

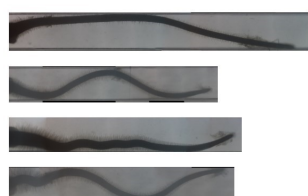

C

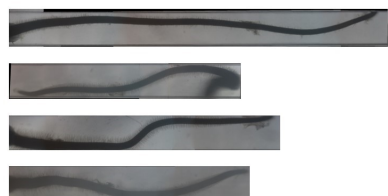

D

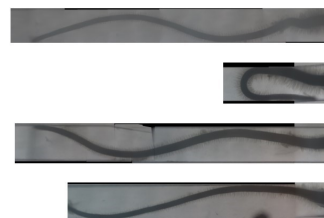

E

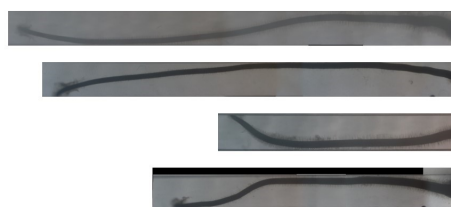

F

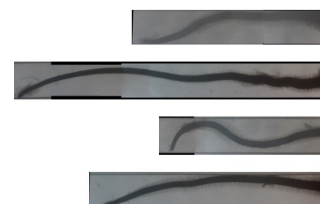

2 mm

**Fig.S3** (Continued)

(g)

Control group

CON1

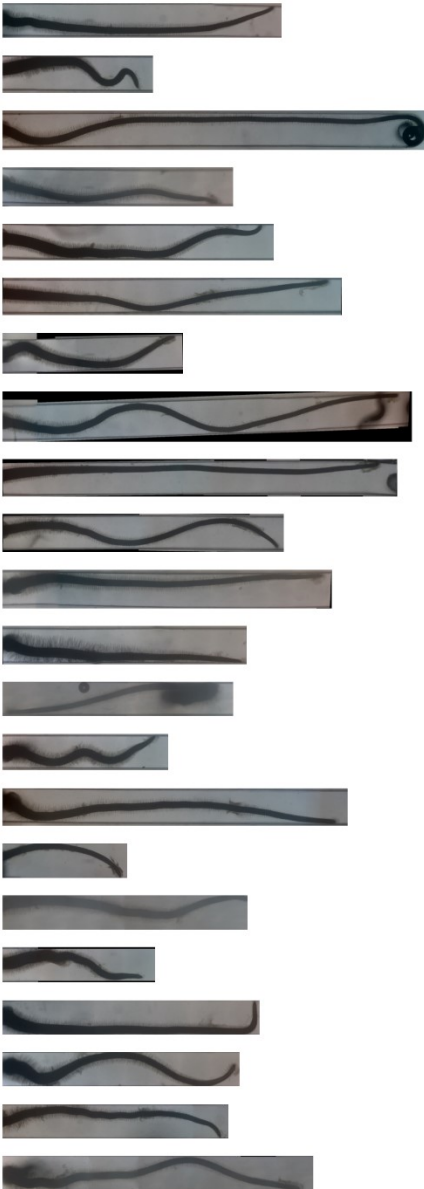

CON2

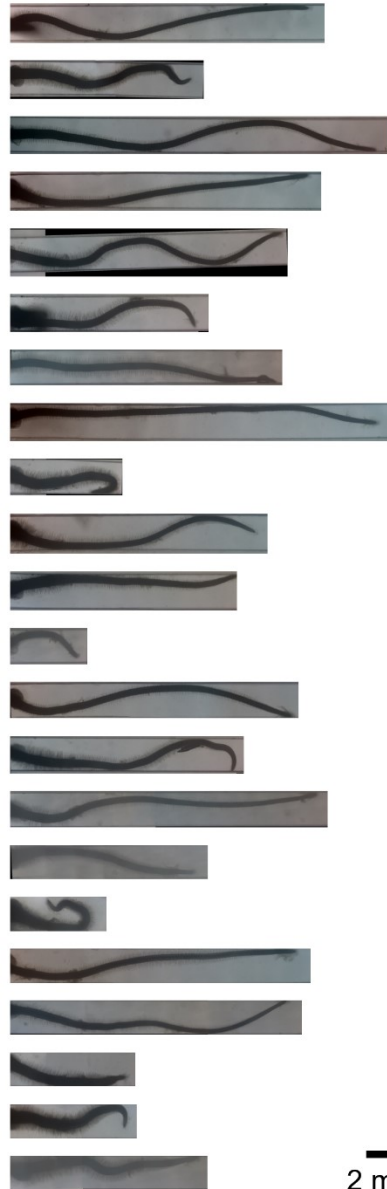

2 mm

Fig.S3 (Continued)

(a) Forward group

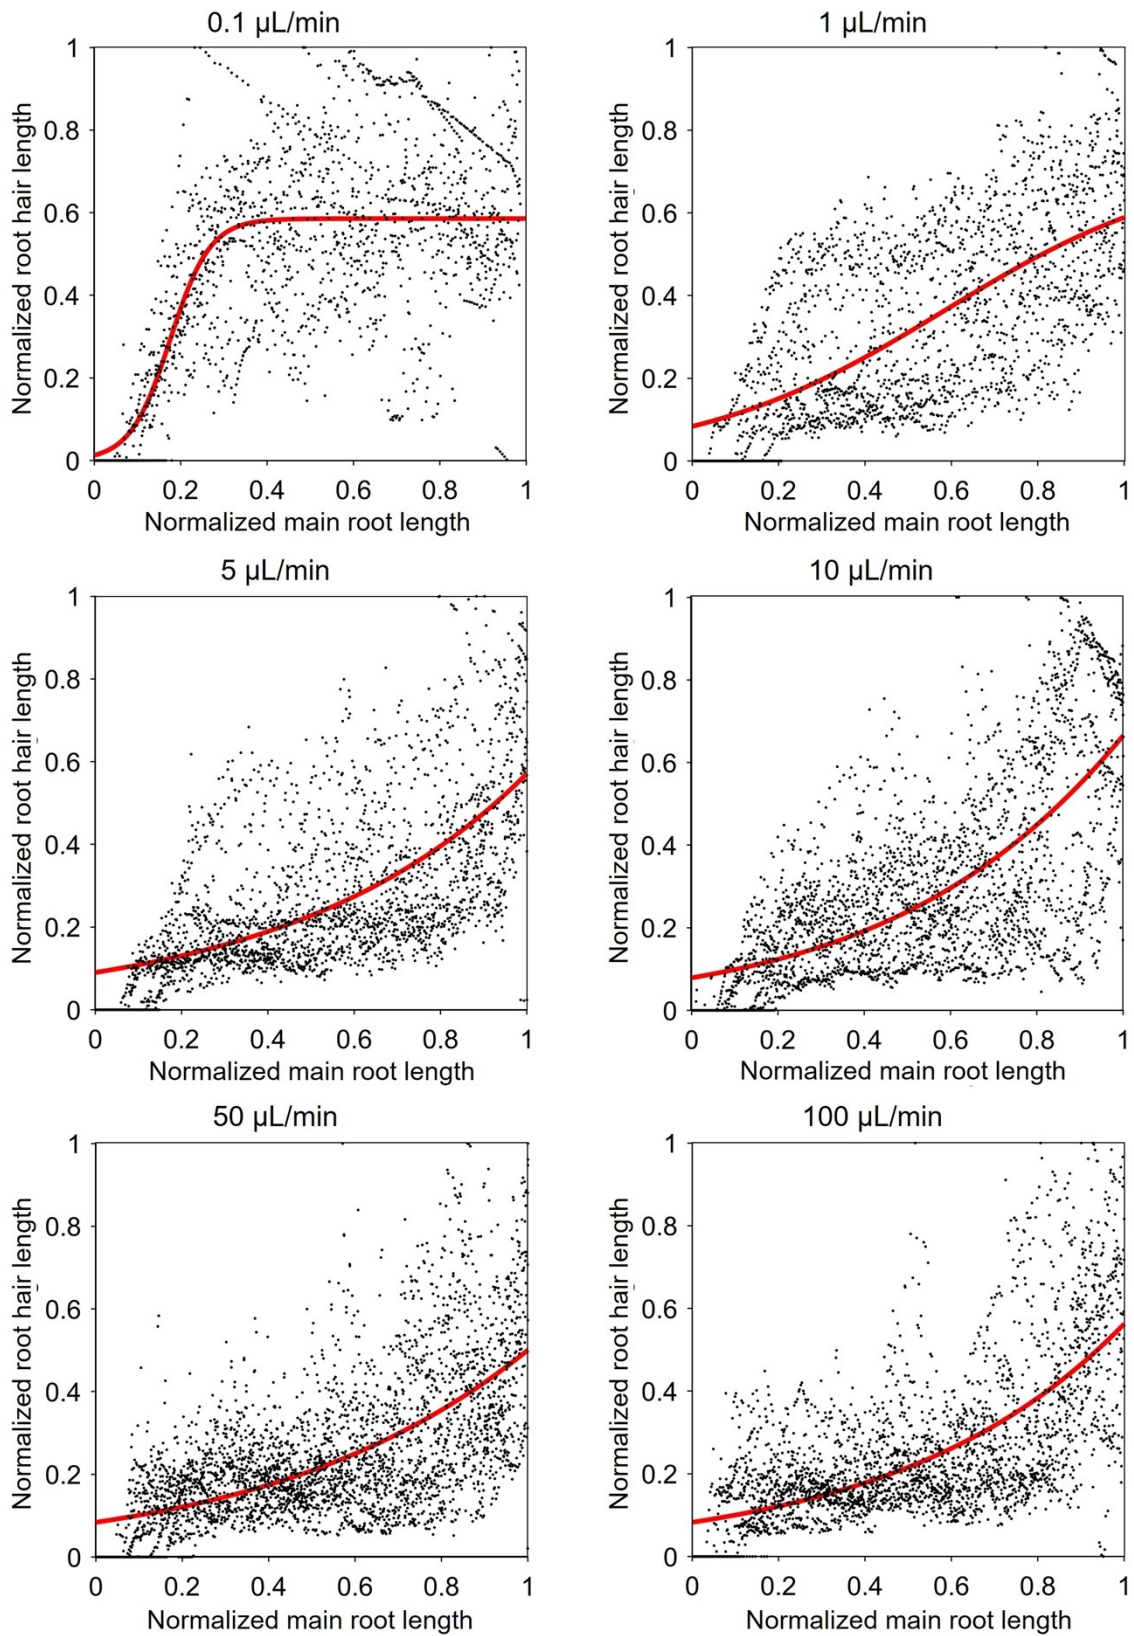

**Fig. S4** Distribution of root hair length for (a) forward, (b) reverse, and (c) control groups. Min-max normalization is used. Black dots and red lines represent root hair length data and fitted curves, respectively

(b) Reverse group

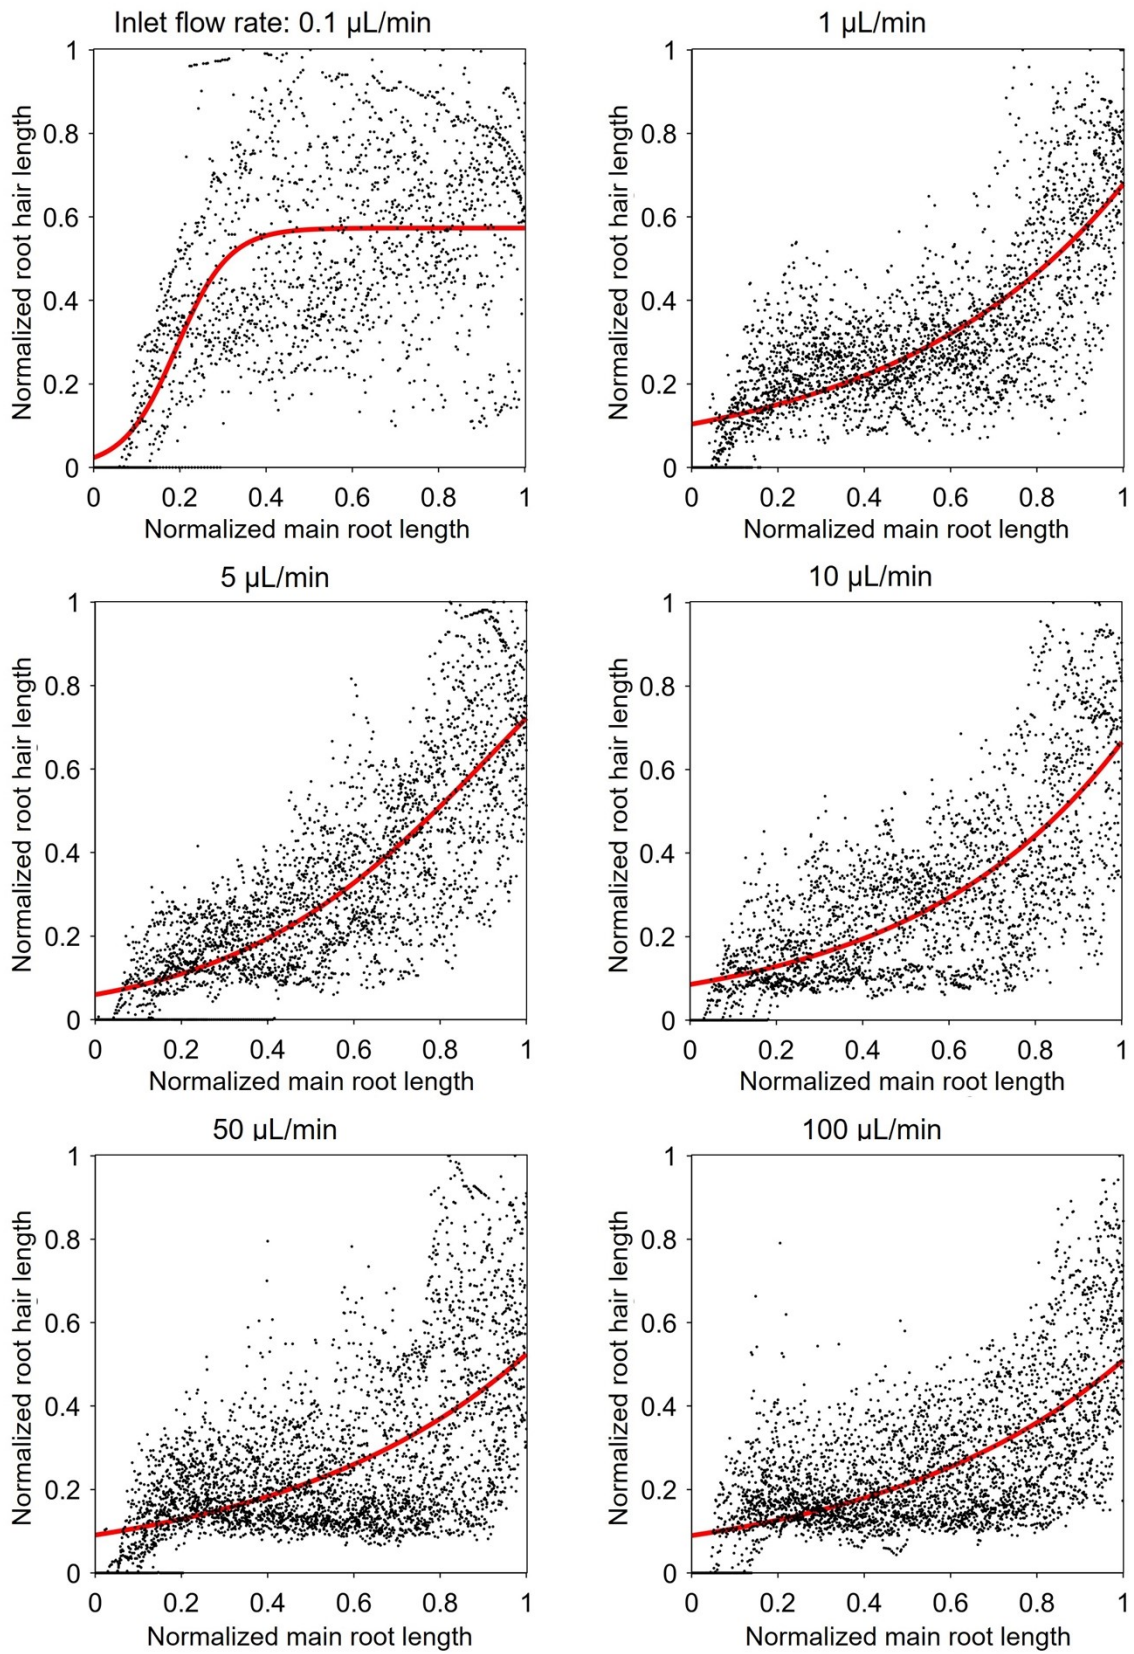

Fig.S4 (Continued)

(c)

Control group

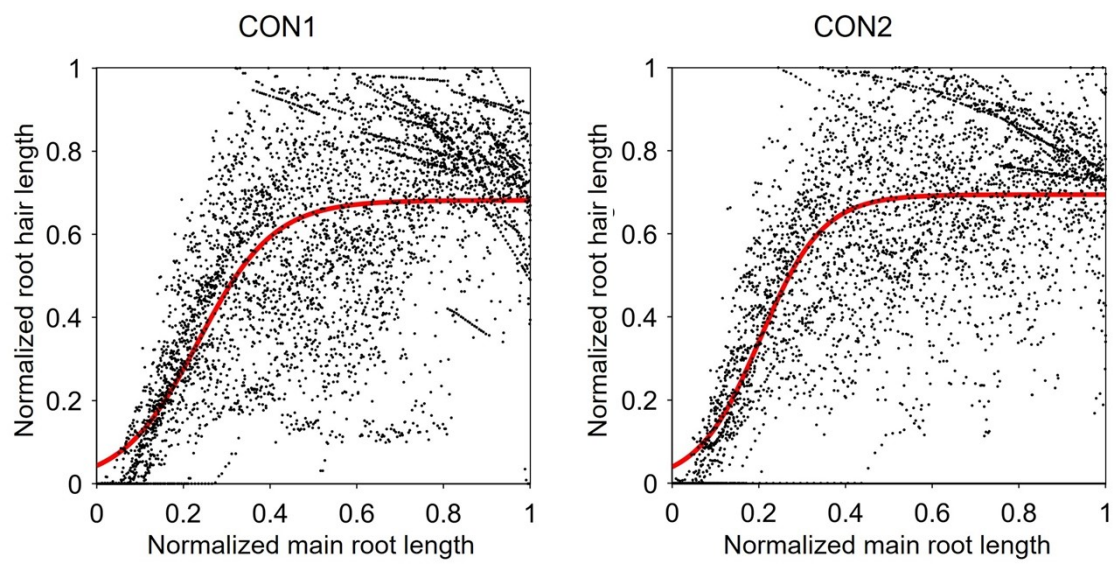

**Fig.S4** (Continued)

(a) Forward group

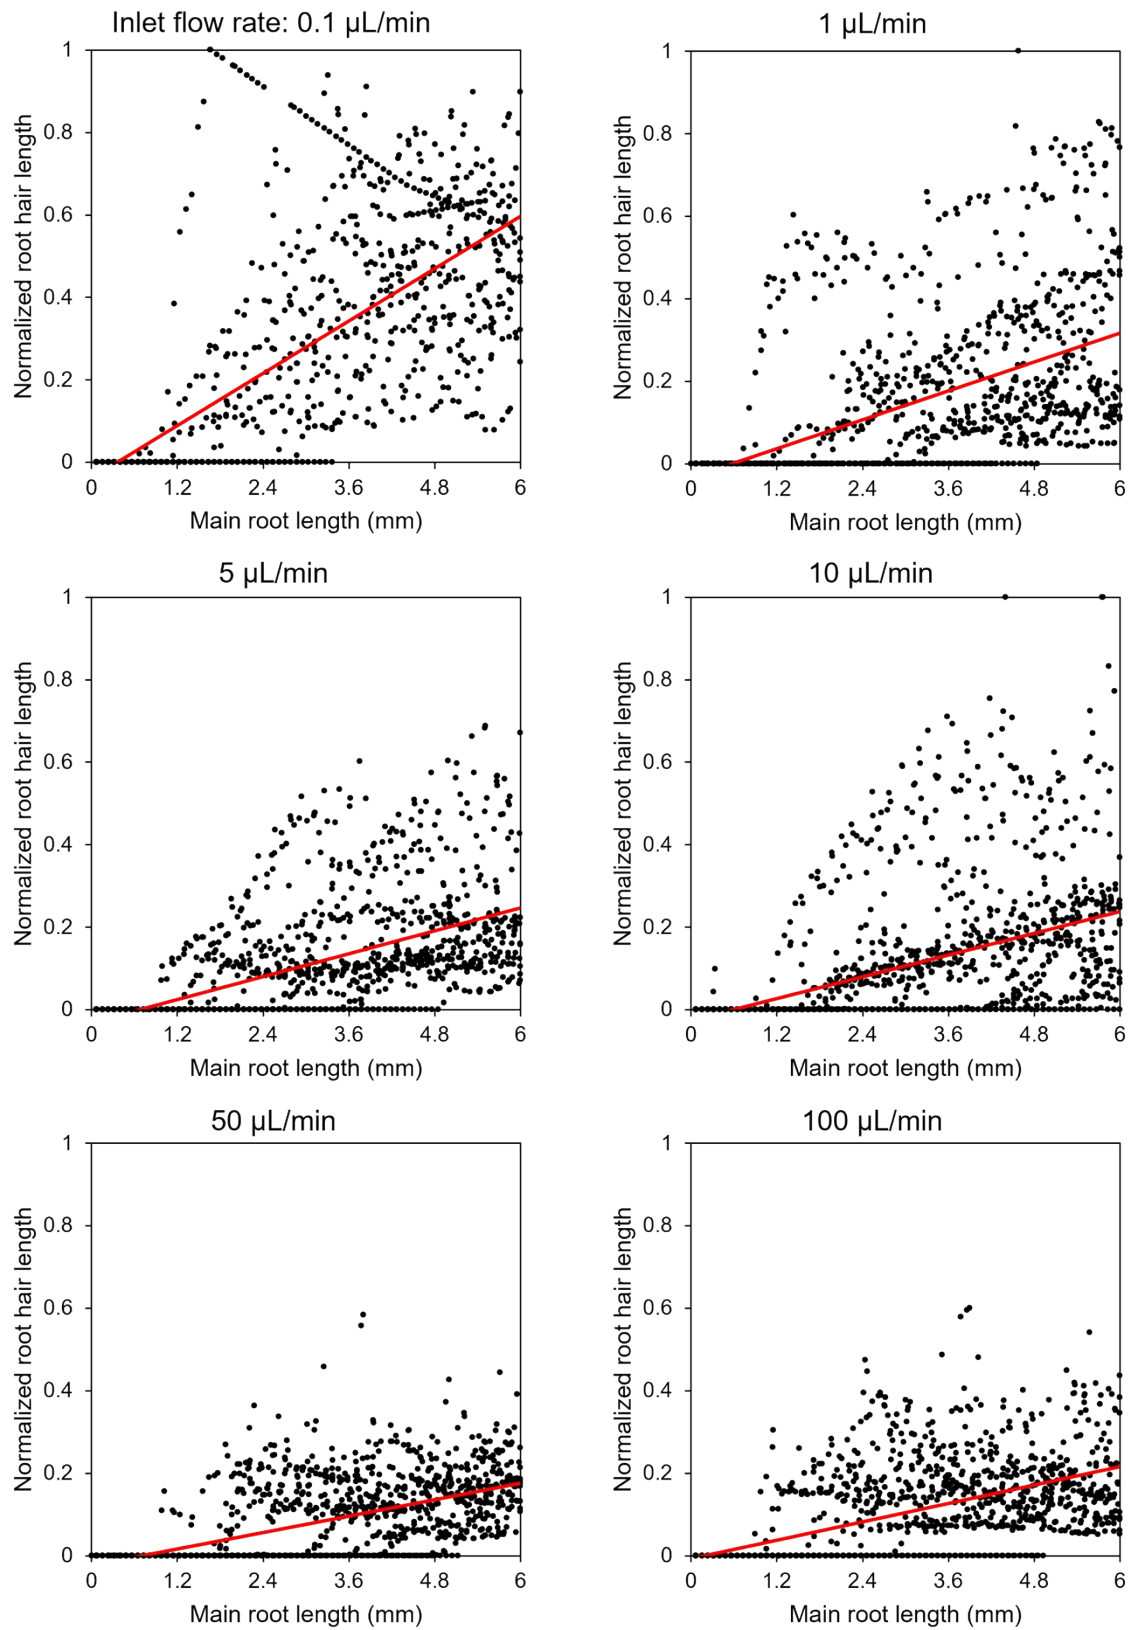

**Fig. S5** Distribution of root hair length for (a) forward, (b) reverse, and (c) control groups within reference zone which is defined as 6 mm from root tip. Min-max normalization is used. Black dots and red lines represent root hair length data and fitted curves, respectively.

(b) Backward group

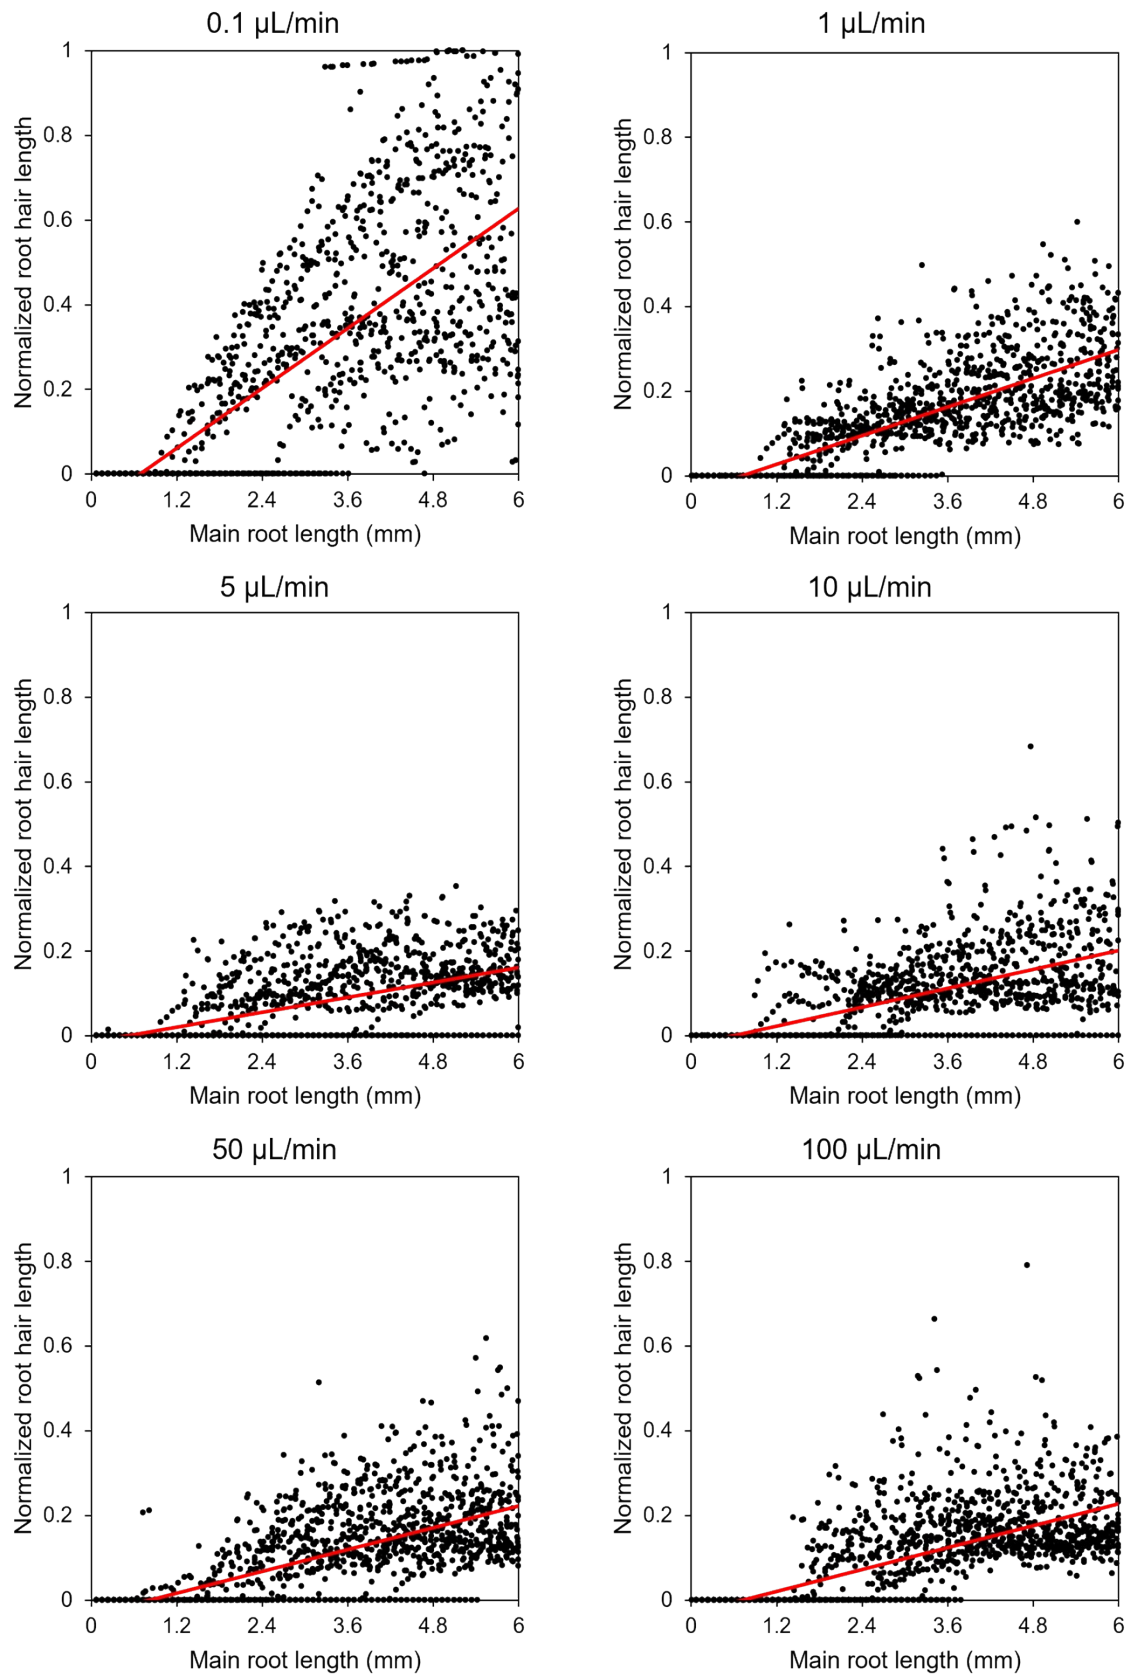

Fig.S5 (Continued)

(c)

Control group

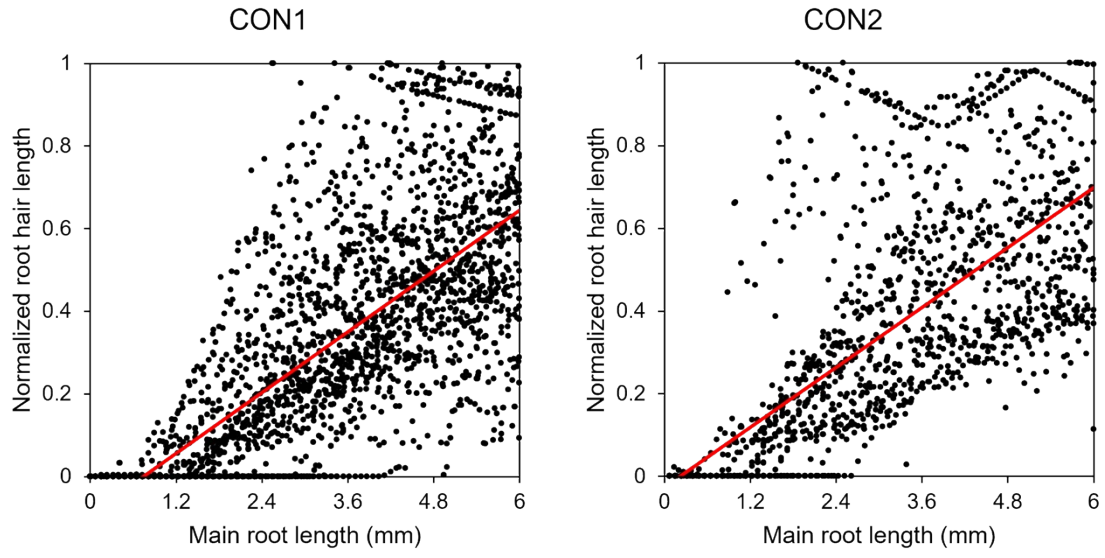

**Fig.S5** (Continued)
